# Supplementary material for: Integrated clinical characteristics and omics analysis identifies a ferroptosis and iron-metabolism-related lncRNA signature for predicting prognosis and therapeutic responses in ovarian cancer
Source: PubMed Central journal article supplement (PMC8772079; doi:10.1186/s13048-022-00944-y), 2022-01-20

**a**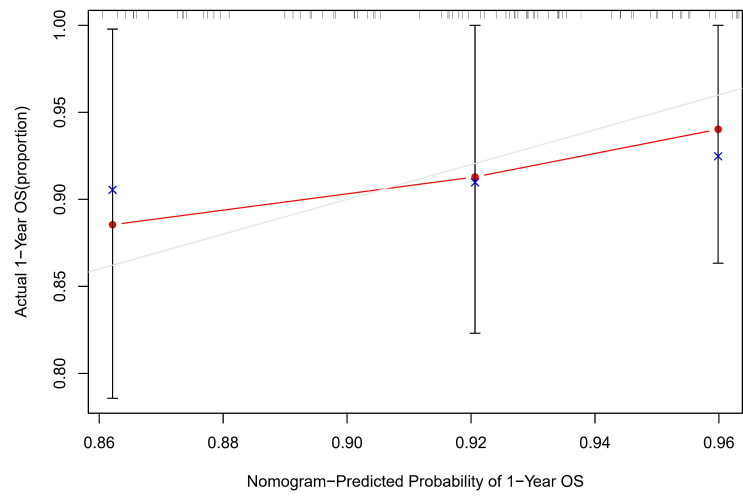**b**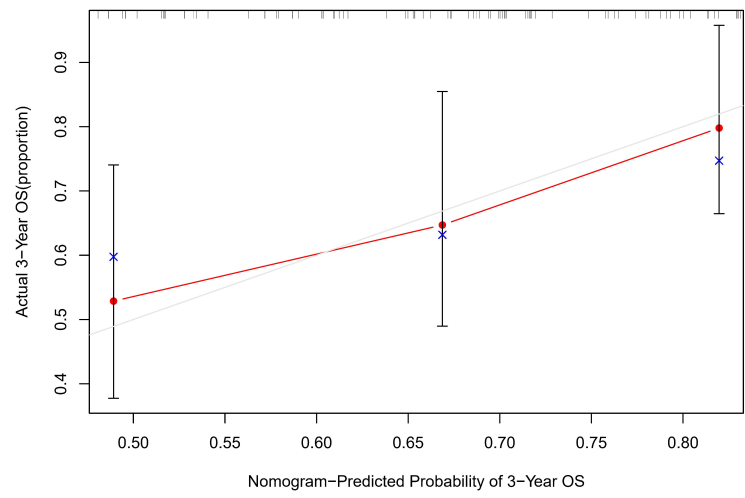**c**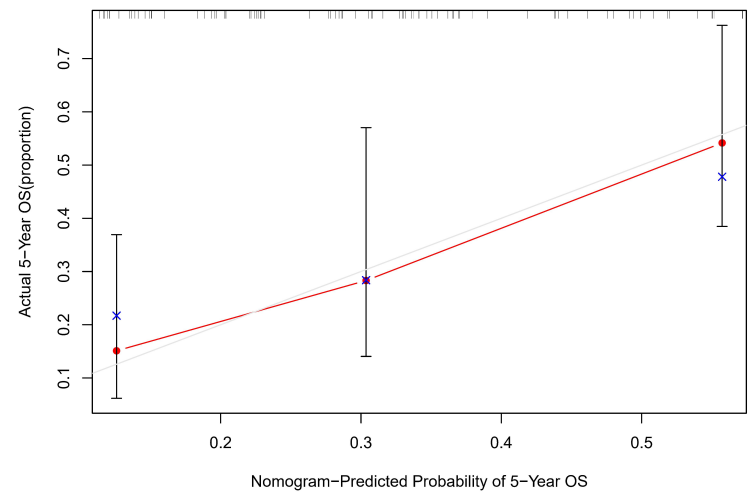**d**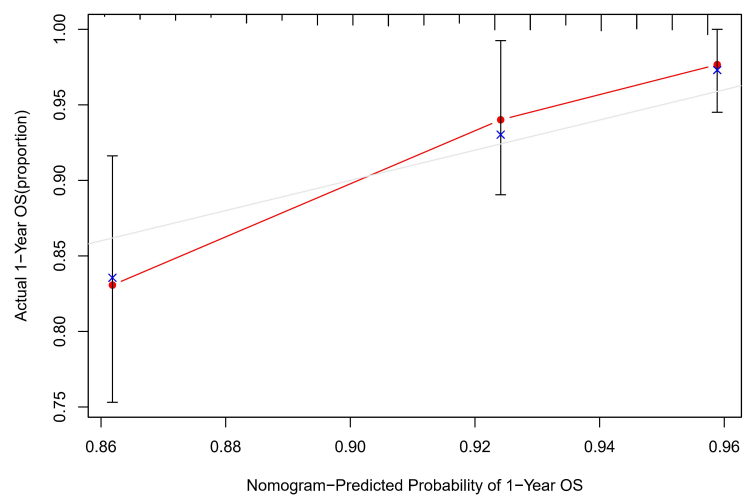**e**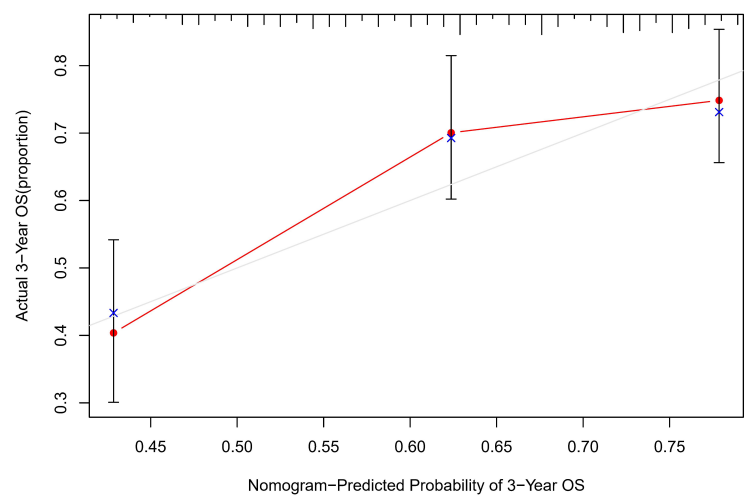**f**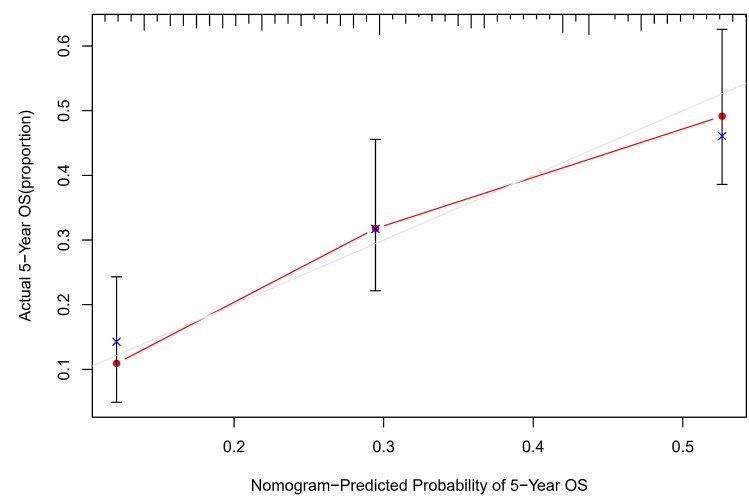

Supplement: 13048_2022_944_MOESM2_ESM.pdf [file 13048_2022_944_MOESM2_ESM.pdf]
