# Supplementary material for: Integrated clinical characteristics and omics analysis identifies a ferroptosis and iron-metabolism-related lncRNA signature for predicting prognosis and therapeutic responses in ovarian cancer
Source: Springer Nature journal article supplement (doi:10.1186/s13048-022-00944-y), 2022-01-20

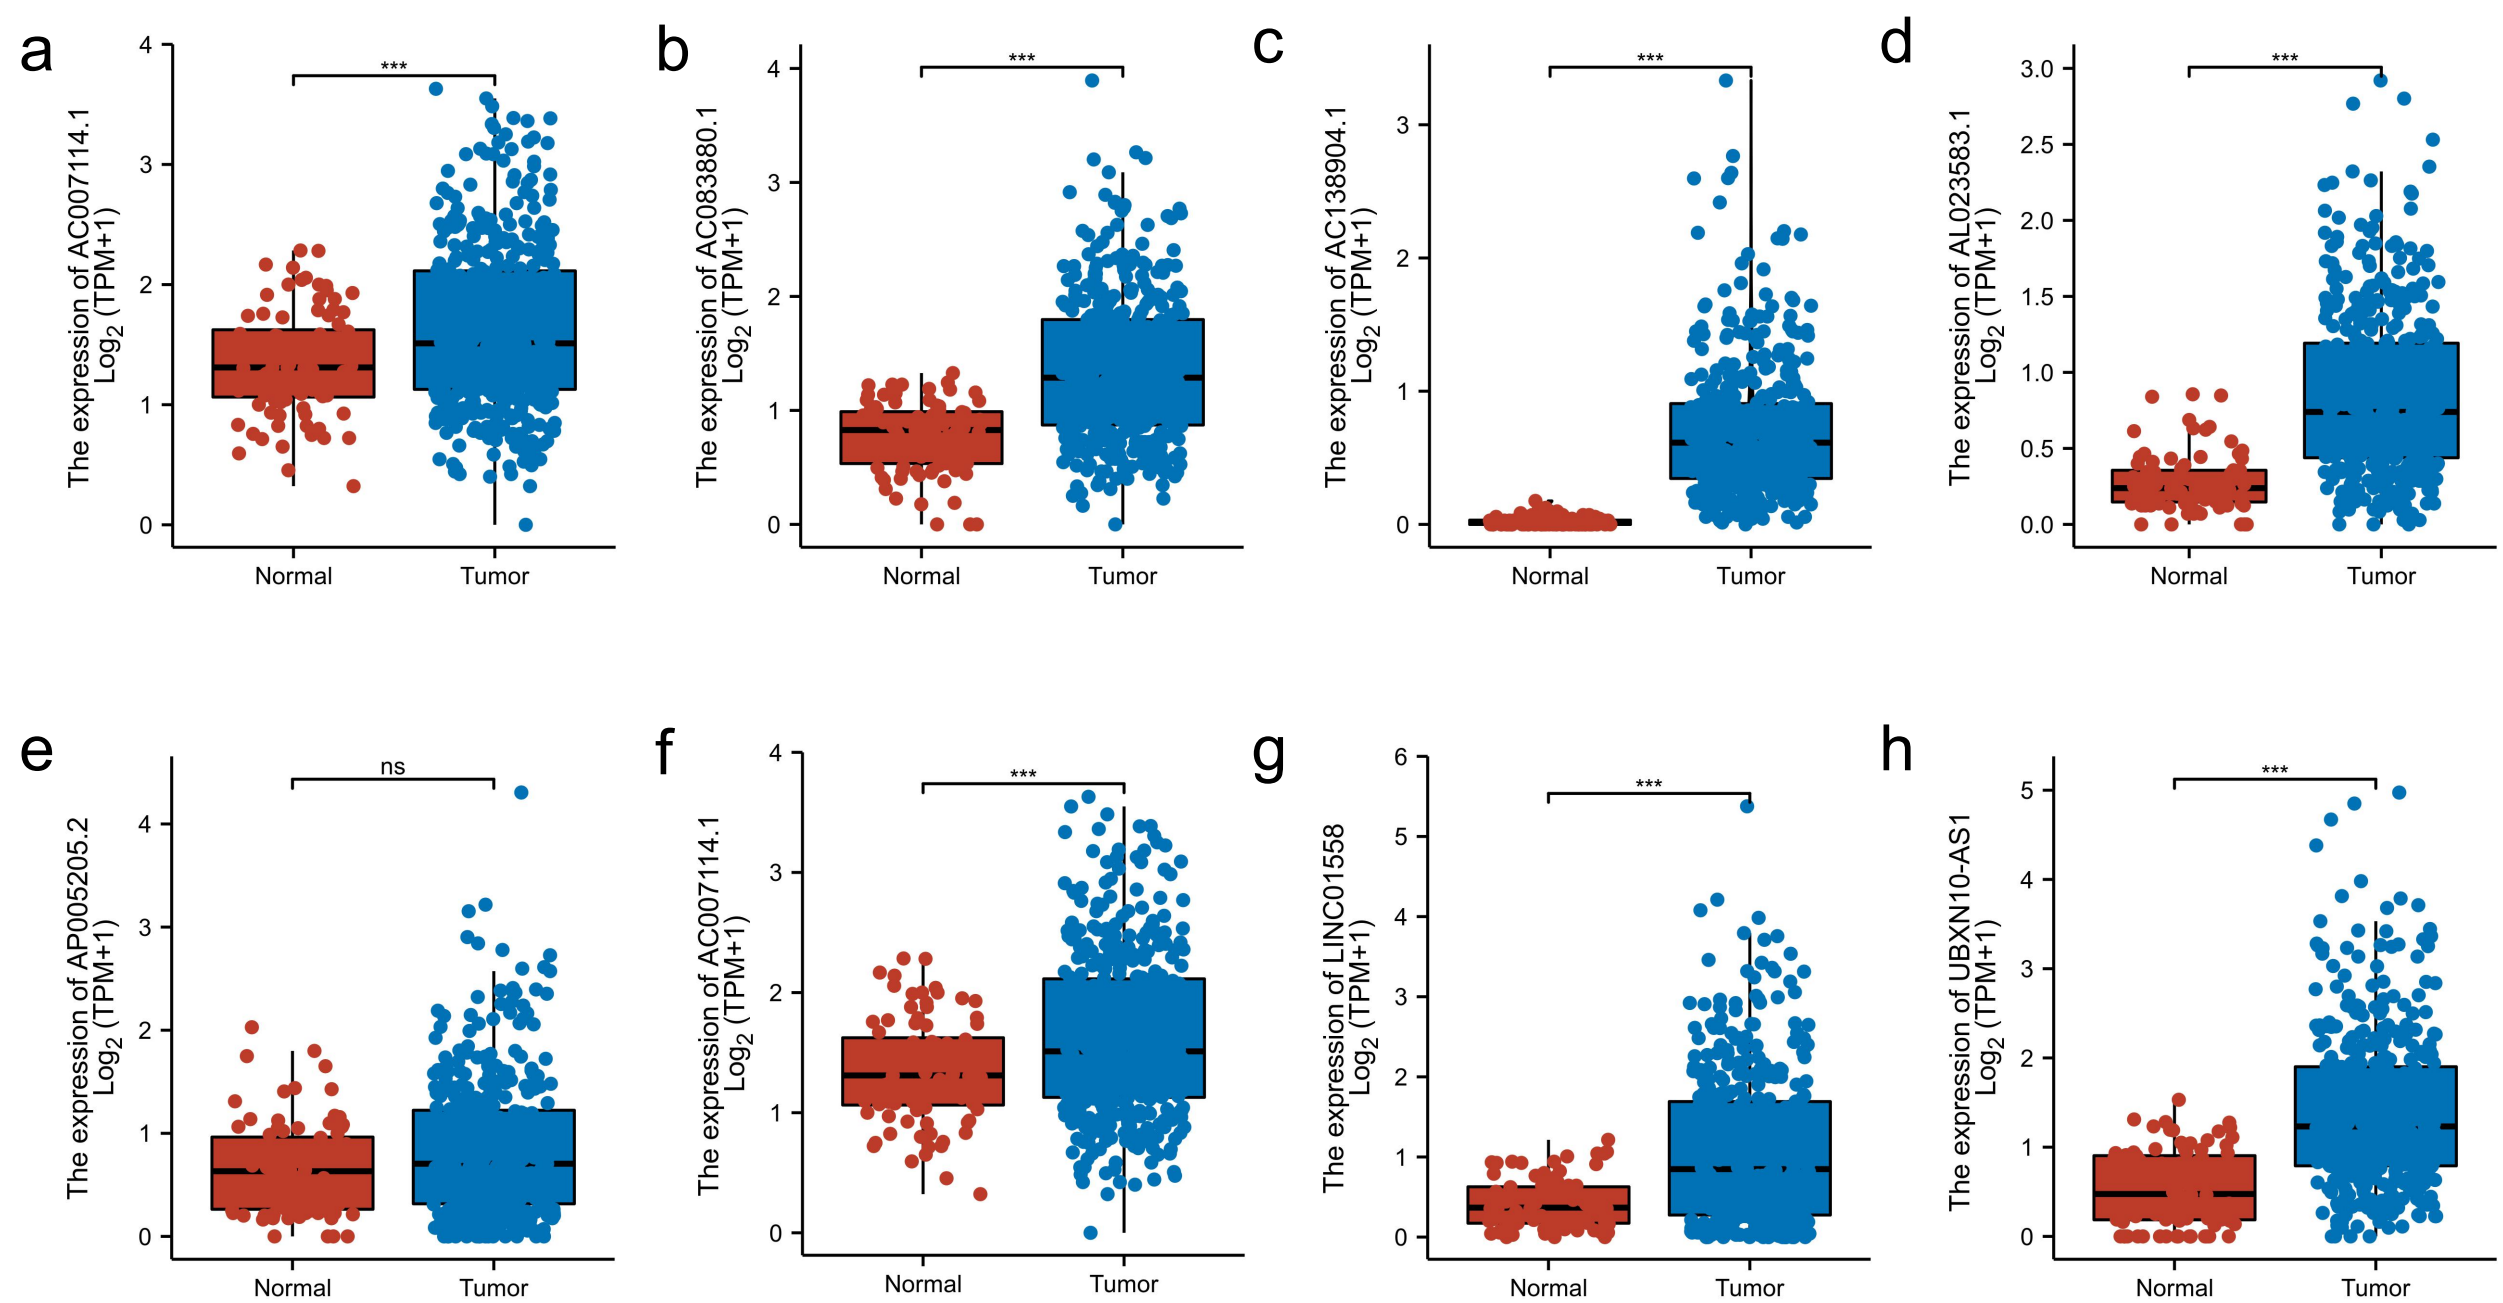

Supplement: MOESM3 [file 20052754]
